# Supplementary material
Source: MDPI journal article supplement (https://www.mdpi.com/2077-1312/11/8/1565)
Supplement: s1 [file s1]

**Table S1.** Performance of different combinations of GLM models for the standardization of mature albacore nominal CPUE.

| No. | Models                                          | AIC    | Null   | Residual | Deviance explained (%) | P(f)   |
|-----|-------------------------------------------------|--------|--------|----------|------------------------|--------|
| 1   | Year                                            | 239549 | 142901 | 138069   | 3.381362               | <0.001 |
| 2   | Year + Month                                    | 238294 | 142901 | 135476   | 5.195905               | <0.001 |
| 3   | Year + Month + Lat                              | 197070 | 142901 | 73374    | 48.65396               | <0.001 |
| 4   | Year + Month + Lat + Lon                        | 188394 | 142901 | 64318    | 54.99122               | <0.001 |
| 5   | Year + Month + Lat + Lon + Hooks + Interactions | 184070 | 142901 | 59045    | 58.68118               | <0.001 |

Lat = Latitude

Lon = Longitude

Interactions = Year\*Lat, Year\*Lon, Lat\*Lon
